# Supplementary material
Source: HighWire-hosted journal article supplement (https://bmjopen.bmj.com/content/15/5/e094068)
Supplement: inline-supplementary-material-4 [file inline-supplementary-material-4.pdf]

Appendix 4: Quality Assessment

|                     | Qualitative Studies                                                                                | Banks et al (2018) | Eldh et al (2020) | Eriksson (2022) | Turner et al (2020) | Casey et al (2017) |
|---------------------|----------------------------------------------------------------------------------------------------|--------------------|-------------------|-----------------|---------------------|--------------------|
| Screening questions | S1. Are there clear research questions?                                                            | Yes                | Yes               | Yes             | Yes                 | Yes                |
|                     | S2. Do the collected data allow to address the research questions?                                 | Yes                | Yes               | Yes             | Yes                 | Yes                |
| Quality criteria    | 1.1. Is the qualitative approach appropriate to answer the research question?                      | Yes                | Yes               | Yes             | Yes                 | Can't tell         |
|                     | 1.2. Are the qualitative data collection methods adequate to address the research question?        | Yes                | Yes               | Yes             | Yes                 | No                 |
|                     | 1.3. Are the findings adequately derived from the data?                                            | Yes                | Yes               | Yes             | Yes                 | Yes                |
|                     | 1.4. Is the interpretation of results sufficiently substantiated by data?                          | Yes                | Yes               | Yes             | Yes                 | Yes                |
|                     | 1.5. Is there coherence between qualitative data sources, collection, analysis and interpretation? | Yes                | Yes               | Yes             | Yes                 | Can't tell         |
|                     | Quality score                                                                                      | High (5/5)         | High (5/5)        | High (5/5)      | High (5/5)          | Low (2/5)          |

|                     | Quantitative Studies                                                          | Edwards et al (2017) | López Seguí et al (2020)a | López Seguí et al (2020)b |
|---------------------|-------------------------------------------------------------------------------|----------------------|---------------------------|---------------------------|
| Screening questions | S1. Are there clear research questions?                                       | Yes                  | Yes                       | Yes                       |
|                     | S2. Do the collected data allow to address the research questions?            | Yes                  | Yes                       | Yes                       |
| Quality criteria    | 4.1. Is the sampling strategy relevant to address the research question?      | Yes                  | Can't tell                | Yes                       |
|                     | 4.2. Is the sample representative of the target population?                   | Yes                  | Yes                       | Yes                       |
|                     | 4.3. Are the measurements appropriate?                                        | Yes                  | Yes                       | Can't tell                |
|                     | 4.4. Is the risk of nonresponse bias low?                                     | Can't tell           | Yes                       | Yes                       |
|                     | 4.5. Is the statistical analysis appropriate to answer the research question? | Yes                  | Can't tell                | Can't tell                |
|                     | Quality score                                                                 | High (4/5)           | Medium (3/5)              | Medium (3/5)              |

|                     | Mixed Methods Studies                                                                                                   | Carter et al (2018) | Farr (2018)  | Willman 2023 | Cowie et al (2018) | Johannsen et al (2020) | Jones et al (2022) |
|---------------------|-------------------------------------------------------------------------------------------------------------------------|---------------------|--------------|--------------|--------------------|------------------------|--------------------|
| Screening questions | S1. Are there clear research questions?                                                                                 | Yes                 | Yes          | Yes          | Yes                | Yes                    | Yes                |
|                     | S2. Do the collected data allow to address the research questions?                                                      | Yes                 | Yes          | Yes          | Yes                | Yes                    | Yes                |
| Quality criteria    | 5.1. Is there an adequate rationale for using a mixed methods design to address the research question?                  | Yes                 | Yes          | Yes          | Yes                | Yes                    | Yes                |
|                     | 5.2. Are the different components of the study effectively integrated to answer the research question?                  | No                  | Can't tell   | Yes          | Can't tell         | Yes                    | Yes                |
|                     | 5.3. Are the outputs of the integration of qualitative and quantitative components adequately interpreted?              | Yes                 | Yes          | No           | Can't tell         | No                     | Can't tell         |
|                     | 5.4. Are divergences and inconsistencies between quantitative and qualitative results adequately addressed?             | No                  | Can't tell   | Can't tell   | No                 | Can't tell             | No                 |
|                     | 5.5. Do the different components of the study adhere to the quality criteria of each tradition of the methods involved? | Yes                 | Yes          | Yes          | Yes                | Yes                    | Yes                |
|                     | Quality score                                                                                                           | Medium (3/5)        | Medium (3/5) | Medium (3/5) | Low (2/5)          | Medium (3/5)           | Medium (3/5)       |
